# Supplementary material
Source: publisher figshare collection journal article supplement (https://acs.figshare.com/ndownloader/files/18727349)
Supplement: Supplementary file 1 [file 18727349]

## Supporting Information

### Hierarchical Porous Metallic V<sub>2</sub>O<sub>3</sub>@C for Advanced Aqueous Zinc-Ion Batteries

Youcai Ding<sup>a,b</sup>, Yuqi Peng<sup>a,b</sup>, Shuanghong Chen<sup>\*a</sup>, Xianxi Zhang<sup>c</sup>, Zhaoqian Li<sup>a</sup>, Lin

Zhu<sup>\*d</sup>, Li-E Mo<sup>a</sup>, Linhua Hu<sup>\*a</sup>

<sup>a</sup>*Key Laboratory of Photovoltaic and Energy Conservation Materials, Institute of Applied Technology, Hefei Institutes of Physical Science, Chinese Academy of Sciences, No. 2221 Changjiangxi Road, Shushan District, Hefei, Anhui, 230088, P.R. China*

<sup>b</sup>*University of Science and Technology of China, No. 96 Jinzhai Road, Baohe District, Hefei, 230026, P.R. China*

<sup>c</sup>*Shandong Provincial Key Laboratory / Collaborative Innovation Center of Chemical Energy Storage & Novel Cell Technology, School of Chemistry and Chemical Engineering, Liaocheng University, Liaocheng, 252000, China*

<sup>d</sup>*School of Physics and Wuhan National High Magnetic Field Center, Huazhong University of Science and Technology, Wuhan 430074, China*

### Corresponding Author

\*E-mail: shchen@rntek.cas.cn

\*E-mail: linzh@hust.edu.cn

\*E-mail: lhhu@rntek.cas.cn

## Materials synthesis

All chemicals were purchased from Sinoreagent and used without any further treatment.

### *Preparation of V-CPs and P-V<sub>2</sub>O<sub>3</sub>@C*

Typically, 2.3 mmol of vanadyl acetylacetonate (VO(acac)<sub>2</sub>) and 3 mmol of 1,4-Benzenedicarboxylic acid (BDC) were dissolved in 50 mL of ethanol absolute (GR,  $\geq 99.8\%$ ), a homogeneous solution was formed by continuous stirring for 30 minutes. The mixed solution was transferred to 100 mL Teflon-lined autoclave and then heated to 180 °C for 12 h. The V-CPs microspheres were collected from the solution by centrifugation and washed with methanol four times and then dried at 80 °C for 12 h in an oven. The V-CPs powders were transferred to tube furnace under N<sub>2</sub> flow and pyrolysis at 700 °C for 1 h with a heating rate of 5 °C min<sup>-1</sup>, the porous P-V<sub>2</sub>O<sub>3</sub>@C microsphere was obtained.

### *Preparation of MIL-47(V) and V<sub>2</sub>O<sub>3</sub>@C*

Typically, 3 mmol of VCl<sub>3</sub> and 3 mmol of 1,4-Benzenedicarboxylic acid (BDC) were dissolved in 50 mL of ethanol absolute (GR,  $\geq 99.8\%$ ), a homogeneous solution was formed by continuous stirring for 30 minutes. The mixed solution was transferred to 100 mL Teflon-lined autoclave and then heated to 120 °C for 48 h. The light green MIL-47(V) was collected from the solution by centrifugation and washed with methanol four times and then dried at 60 °C for 12 h in an oven. The MIL-47(V) powders were transferred to tube furnace under N<sub>2</sub> flow and pyrolysis at 500 °C for 1 h with a heating rate of 5 °C min<sup>-1</sup>, the black V<sub>2</sub>O<sub>3</sub>@C was obtained.

## **Materials characterization**

The microstructures of P-V<sub>2</sub>O<sub>3</sub>@C and V<sub>2</sub>O<sub>3</sub>@C were acquired on a field emission scanning electron microscope (FESEM, Zeiss Sigma) operated at an accelerating voltage of 10.0 kV. Transmission electron microscopy (TEM) images of the samples were obtained with a JEOL2010 microscope, operated at an acceleration voltage of 200 kV. To analyze the crystal phases of the samples, powder X-ray diffraction (XRD) patterns were recorded on a Rigaku SmartLab X-ray diffractometer-9KW with Cu-K $\alpha$  radiation (1.5418 Å). X-ray photoelectron spectroscopy (XPS) was performed in vacuum with a Kratos Axis Ultra X-ray photoelectron spectrometer using an excitation source of monochromatic Al K $\alpha$  radiation at 15 kV and 150 W. The surface areas and pore structure of the samples were measured by N<sub>2</sub> adsorption/desorption experiments on a Micromeritics Accelerated Surface Area and Porosimetry System (ASAP2460). Raman scattering spectra were taken on a Renishaw System 2000 spectrometer using the 514.5 nm line of Ar<sup>+</sup> for excitation.

## **Electrochemical measurements**

The electrochemical performance of P-V<sub>2</sub>O<sub>3</sub>@C and V<sub>2</sub>O<sub>3</sub>@C sample was evaluated using the CR2032-type coin cells. The working electrodes prepared by mixing the active materials, carbon black and polyvinylidene fluoride (PVDF, 5 wt% in NMP) with a weight ratio of 70:20:10 in 1-Methyl-2-pyrrolidinone (NMP). The resulting slurry was scraped onto stainless steel mesh (250 mesh) and dried in vacuum at 80 °C for 12 h. The mass loading of the electrode materials is about 2 mg cm<sup>-2</sup>. The 2032-type coin cell assembled in open air with a zinc plate (100  $\mu$ m, thick) as the anode, glass

fiber was used as the separator and 3 M  $\text{Zn}(\text{CF}_3\text{SO}_3)_2$  aqueous electrolyte. Galvanostatic cycling test of the assembled cells was conducted on a BTS 400 system (Shenzhen, China) in the voltage range of 0.3-1.5 V (vs.  $\text{Zn}^{2+}/\text{Zn}$ ) at different current density. Galvanostatic Intermittent Titration Technique (GITT) was employed to determine the  $\text{Zn}^{2+}$  ion diffusion coefficients in  $\text{V}_2\text{O}_3$  cathode. In our GITT study, a cell was charged or discharged at 100 mA  $\text{g}^{-1}$  rate for 10 min, followed by a 20 min open circuit step to allow relaxation back to equilibrium.

### **The first principle calculations**

The first principle calculations based on projector-augmented-wave (PAW) pseudopotential approximations and Perdew-Burke-Ernzerhof (PBE) exchange correlation function implemented in Vienna Ab-initio Simulation Package (VASP). A Monkhorst-Pack k-point grid is employed. The plane-wave energy cutoff is chosen as 600eV. All the lattice parameters and the ionic positions are fully optimized until the force is less than  $5\text{E-}4 \text{ eV/\AA}$ . Then, the optimized structure was adopted to calculate the density of states (DOS) and the differential charge state.

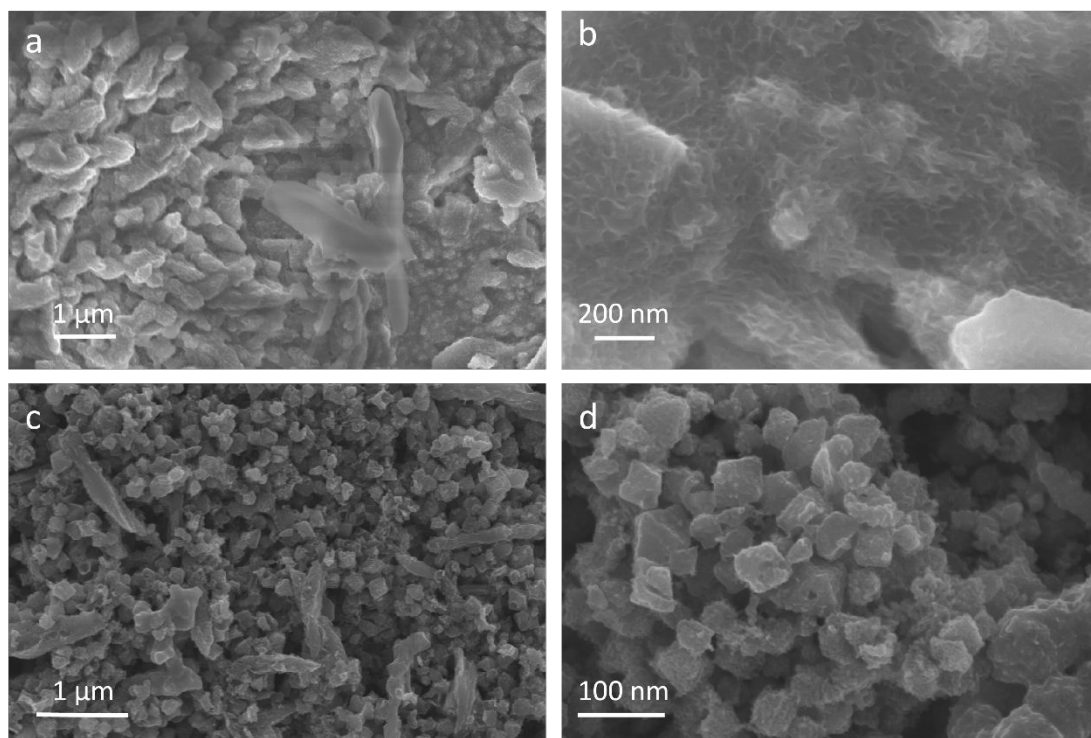

**Figure S1.** SEM images of MIL-47(V) at (a) low resolution and (b) high resolution.

SEM images of  $V_2O_3@C$  at (c) low resolution and (d) high resolution.

**Table S1.** The contents of C, O and V in P- $V_2O_3@C$  and  $V_2O_3@C$ .

| Materials     | C     | O     | V     |
|---------------|-------|-------|-------|
| P- $V_2O_3@C$ | 56.98 | 31.64 | 11.38 |
| $V_2O_3@C$    | 53.54 | 30.85 | 15.61 |

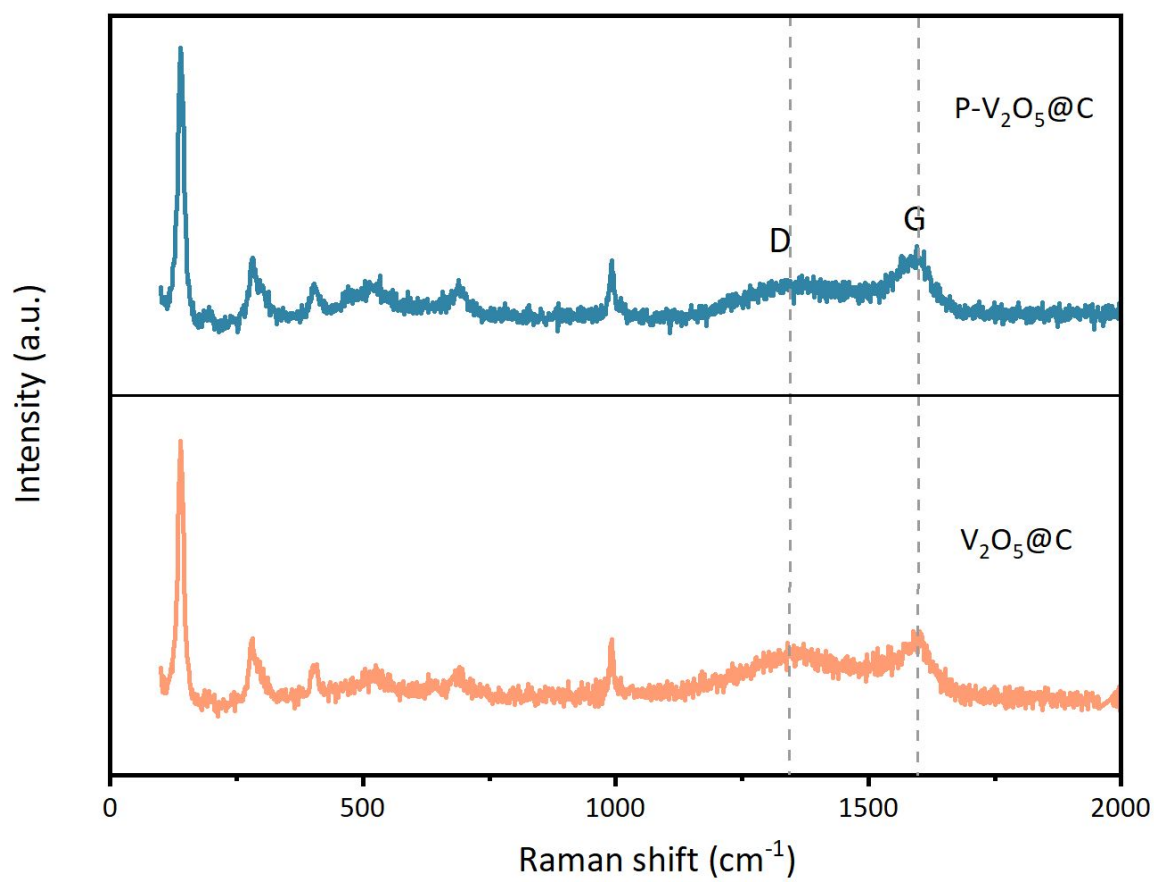

**Figure S2.** The Raman spectrum of P-V<sub>2</sub>O<sub>3</sub>@C and V<sub>2</sub>O<sub>3</sub>@C.

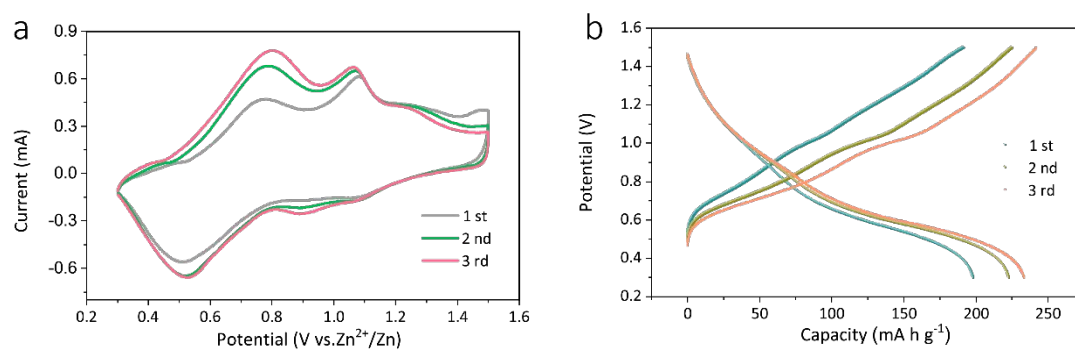

**Figure S3.** (a) CV and (b) charge-discharge curves for the initial three cycles of V<sub>2</sub>O<sub>3</sub>@C.

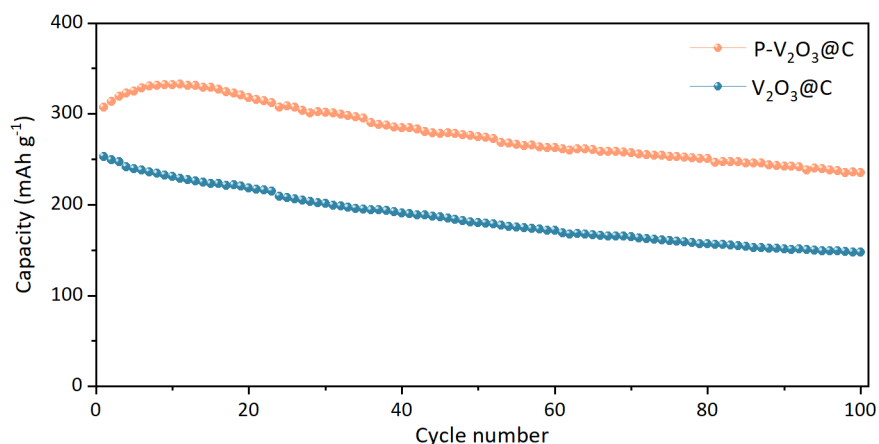

**Figure S4.** Long-term cycling performance at a current rate of 100 mA g<sup>-1</sup>.

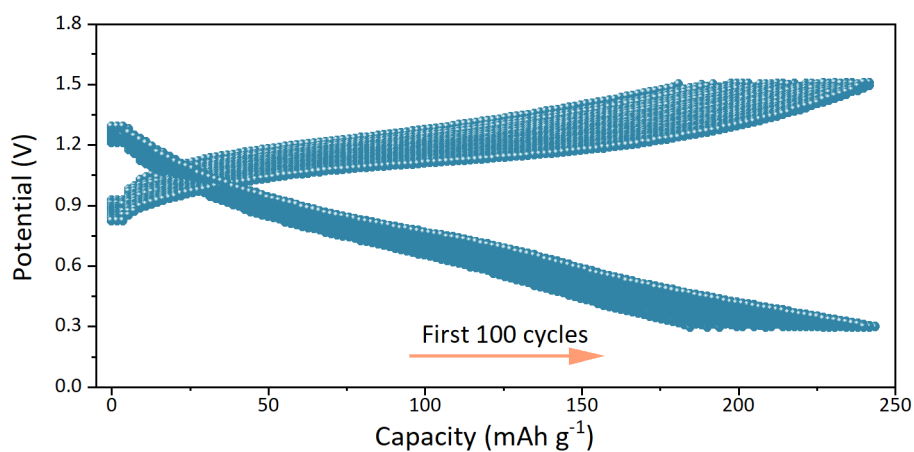

**Figure S5.** The charge and discharge profiles in the first 100 cycles.

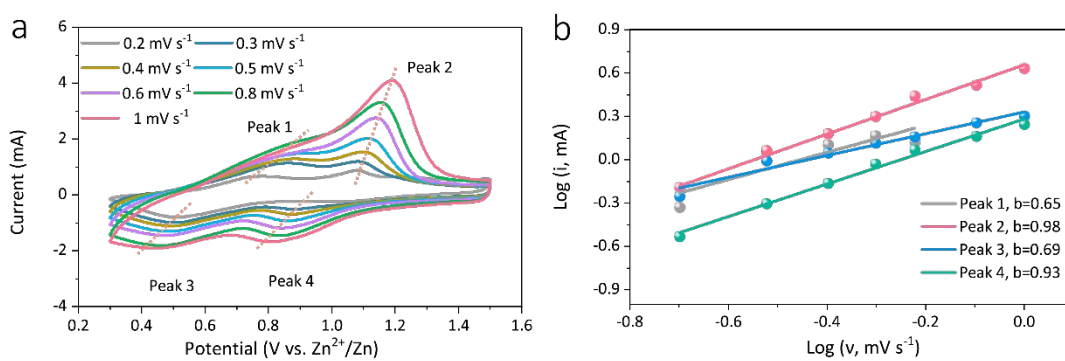

**Figure S6.** (a) CV curves of V<sub>2</sub>O<sub>3</sub>@C at different scan rates. (b) Log *i* versus log *v* plots of V<sub>2</sub>O<sub>3</sub>@C based on the CV profiles at different scanning rates.

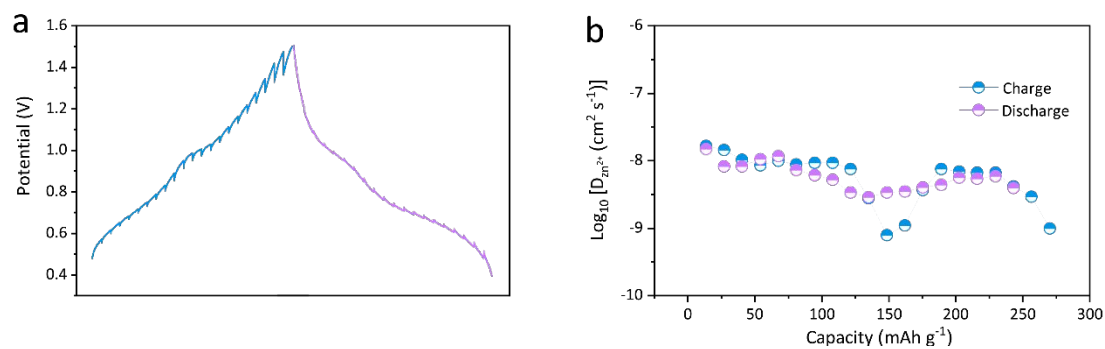

**Figure S7.** (a) GITT curves at a current density of  $100 \text{ mA g}^{-1}$  and (b) the corresponding  $\text{Zn}^{2+}$  diffusion coefficient during the charge-discharge scan of  $\text{V}_2\text{O}_3@\text{C}$ .

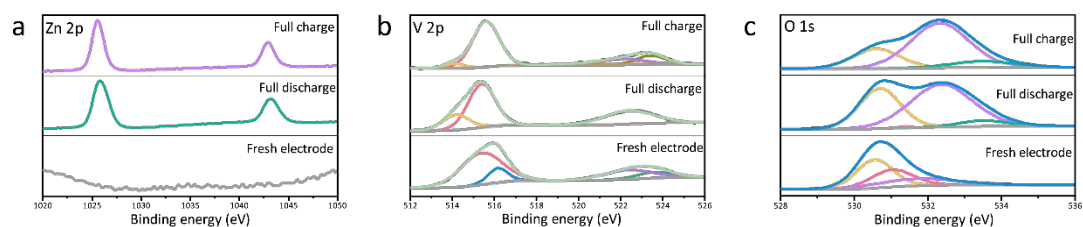

**Figure S8.** High-resolution XPS spectra of (a) Zn 2p, (b) V 2p and (c) O 1s of the P- $\text{V}_2\text{O}_3@\text{C}$  electrode at the pristine state and full first discharge (0.3 V) and charge state (1.5 V).
